# Supplementary material for: Antiherpetic Activity of Taurisolo®, a Grape Pomace Polyphenolic Extract
Source: MDPI journal article supplement (doi:10.3390/microorganisms11051346), 2023-05-20
Supplement: s1 [file s1]

## Supplementary Material

### Methods

#### *Taurisolo® formulation*

To obtain the Taurisolo® briefly, grapes were extracted with hot water (50°C), and the solution was filtrated and concentrated and underwent a spray-drying process with maltodextrins as support (5–15%) obtaining a fine microencapsulated powder that was analyzed by High-Performance Liquid Chromatography-diodearray detector (HPLC-DAD, Jasco Inc., Easton, MD, USA). The Taurisolo® polyphenol profile is the following: Ferulic acid  $14.59 \pm 0.98$  µg/g, Resveratrol  $12.55 \pm 0.02$  µg/g, Caffeic acid  $35.00 \pm 3.00$  µg/g, p-coumaric acid  $122.75 \pm 2.77$  µg/g, Rutin  $98.81 \pm 7.31$  µg/g, Quercetin  $135.41 \pm 4.69$  µg/g, Procyanidin B1 dimer  $946.33 \pm 55.20$  µg/g, Procyanidin B2 dimer  $645.89 \pm 59.17$  µg/g, Syringic acid  $310.95 \pm 0.01$  µg/g, Epicatechin  $1696.55 \pm 109.60$  µg/g, Gallic acid  $199.46 \pm 4.59$  µg/g; Catechin  $2499.04 \pm 307.41$  µg/g.

#### *UHPLC-UV profile (280-330 nm) of Taurisolo® via ESI-IT-TOF-MS/MS*

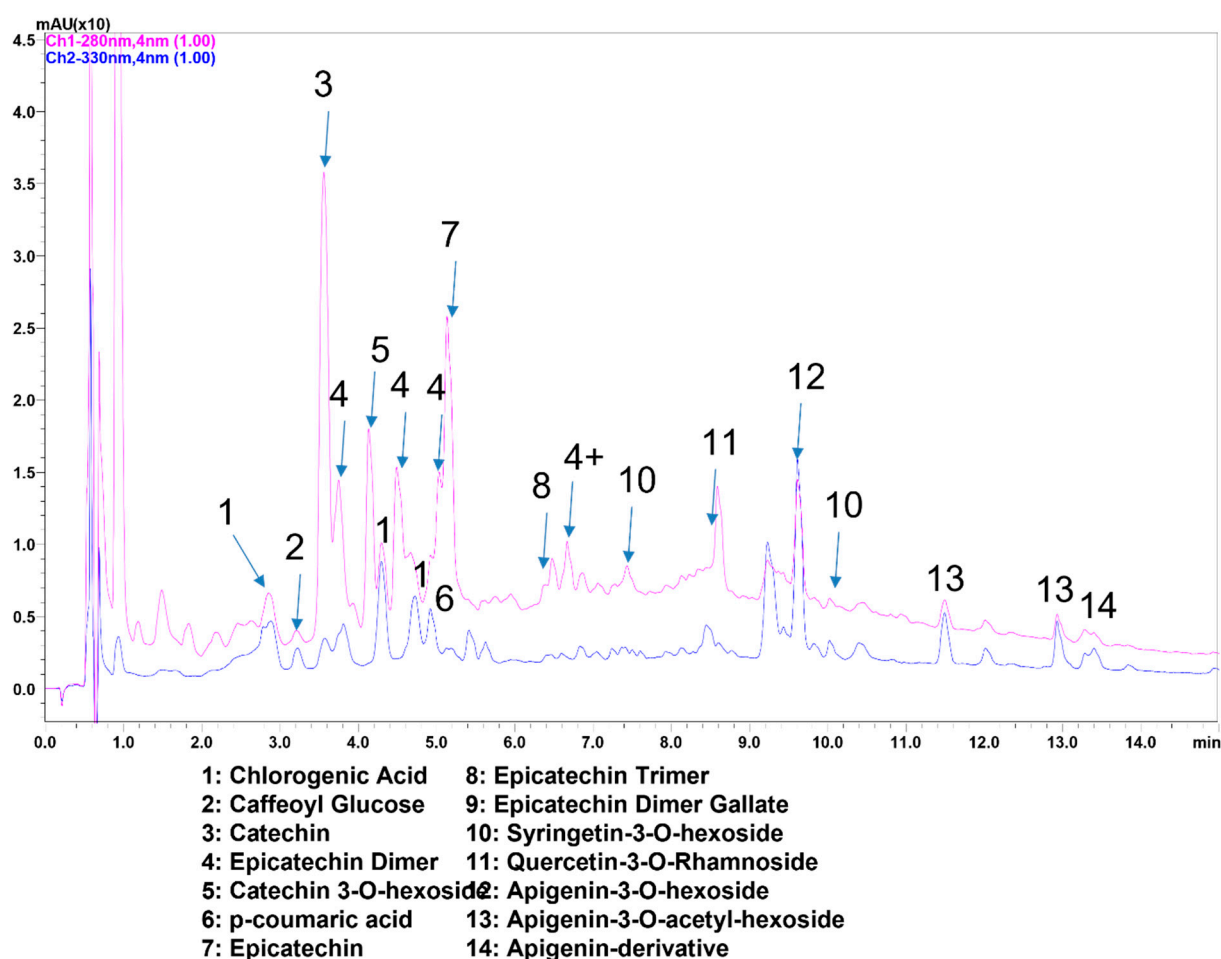

Figure S1. Chromatogram of Taurisolo® with peaks relative to polyphenol fraction.

**Results***Cytotoxicity*

|         | Taurisolo®       | Maltodextrins |
|---------|------------------|---------------|
| [µg/mL] | % cell viability |               |
| 800     | 40               | 98.5          |
| 400     | 88.05            | 99.24         |
| 200     | 98.48            | 100           |
| 100     | 100              | 100           |
| 50      | 100              | 100           |
| 25      | 100              | 100           |
| 12.5    | 100              | 100           |
| 6.25    | 100              | 100           |
| 3.125   | 100              | 100           |
| 1.5     | 100              | 100           |
| 0.78    | 100              | 100           |
| 0.39    | 100              | 100           |
| 0.19    | 100              | 100           |
| 0.097   | 100              | 100           |
| 0.048   | 100              | 100           |
| 0.024   | 100              | 100           |
| 0.012   | 100              | 100           |

Table S1. Cytotoxic activity of Taurisolo® and Maltodextrins evaluated by MTT assay. Different concentrations of compounds were tested (800-0.012µg/mL) and data were expressed as percentage of viability.
